# Supplementary material for: Controlled assembly of hybrid architectures based on carboxylic acid ligands and [(O3PCH2PO3)Mo6O22]12−
Source: Royal Society of Chemistry journal article supplement (doi:10.1039/c5ra01955a), 2015-01-01
Supplement: c5ra01955a1.pdf [file c5ra01955a1.pdf]

## Supporting Information

### Controlled assembly of hybrid architectures based on carboxylic acid ligand

### and $[(O_3PCH_2PO_3)Mo_6O_{22}]^{12-}$

Xiaopeng Sun, Donghui Yang, Gaigai Wang, Zhijie Liang, Pengtao Ma, Jingping Wang\* and  
Jingyang Niu\*

Key Laboratory of Polyoxometalate Chemistry of Henan Province,  
Institute of Molecular and Crystal Engineering,  
College of Chemistry and Chemical Engineering,  
Henan University, Kaifeng 475004, Henan, China,  
E-mail: jpwang@henu.edu.cn, jyniu@henu.edu.cn; Fax: (+86)371-23886876.

#### CONTENTS

Section1. IR spectra of **1–3** and carboxylic acid ligands

Section2. The comparison of experimental XRPD patterns (in red) and simulated (in black) of **1–3**

Section3. The UV-vis spectra of **1–3**

Section4.  $^{31}P$  NMR spectroscopic characterization of **1–3** with time and  $H_2O_3PCH_2PO_3H_2$

Section5. Thermogravimetric analyses of **1–3**

Section6. Bond valence sum calculations of Mo, P and O atoms on POM fragments in **1–3**

Section7. The coordination environment of P1 and P2 atoms in **1–3**

Section8. Some other supporting figures and Table S5

Section9. References

### Section1. IR spectra of 1–3 and carboxylic acid ligands

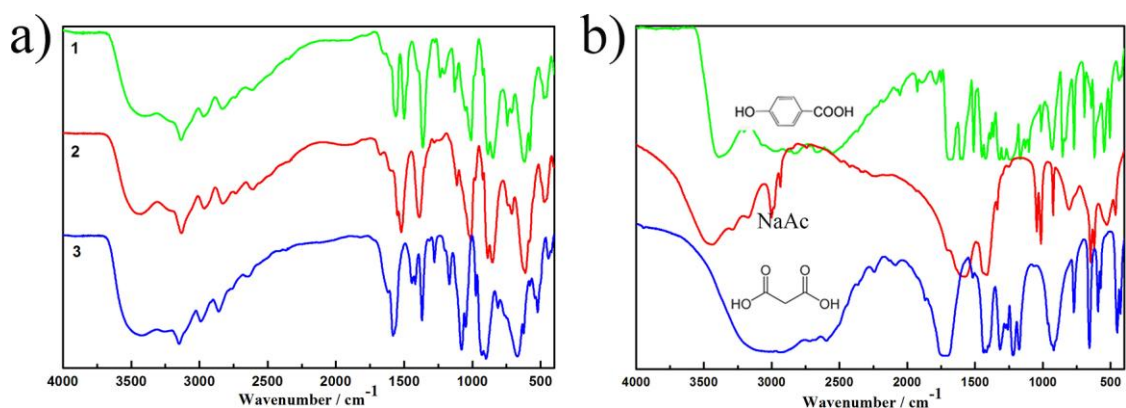

Fig. S1 (a) IR spectra of 1–3; (b) IR spectra of p-hydroxybenzoic acid, NaAc and malonic acid

### Section2. The comparison of experimental XRPD patterns (in red) and simulated (in black) of 1–3

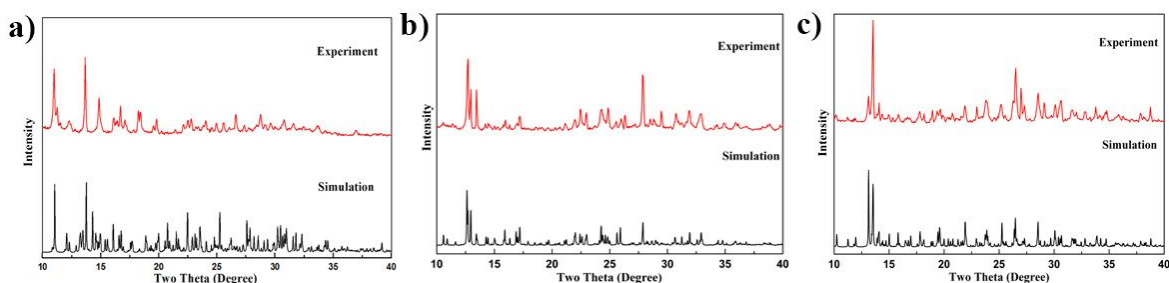

Fig. S2 The Comparison of simulated (in black) and experimental XRPD patterns (in red) of 1–3

The comparison of the simulated and experimental XRPD patterns for **1**, **2** and **3** are shown in Fig.S2a, S2b and S2c, respectively. Their peak positions are in good agreement with each other, indicating the phase purity of the products. The differences in intensity may be due to the preferred orientation of the powder samples.

### Section3. The UV-vis spectra of 1–3

The UV-vis spectra of **1–3** are performed in the aqueous solution at ambient temperature. The UV-vis spectra display one strong absorption band centered at 206 nm which is assigned to the  $p\pi-d\pi$  charge transfer transitions from  $O_t \rightarrow Mo$ . The wide shoulder absorption band centered at ca. 247 nm of **1** is attributed to  $O_{b,c} \rightarrow Mo$  charge transfer transitions.<sup>[S1]</sup>

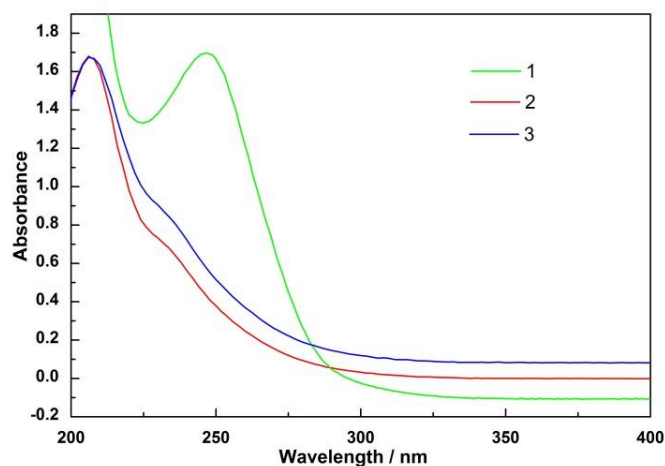

Fig. S3 UV-vis spectra of 1–3.

#### Section4. $^{31}\text{P}$ NMR spectroscopic characterization of 1–3 with time and $\text{H}_2\text{O}_3\text{PCH}_2\text{PO}_3\text{H}_2$

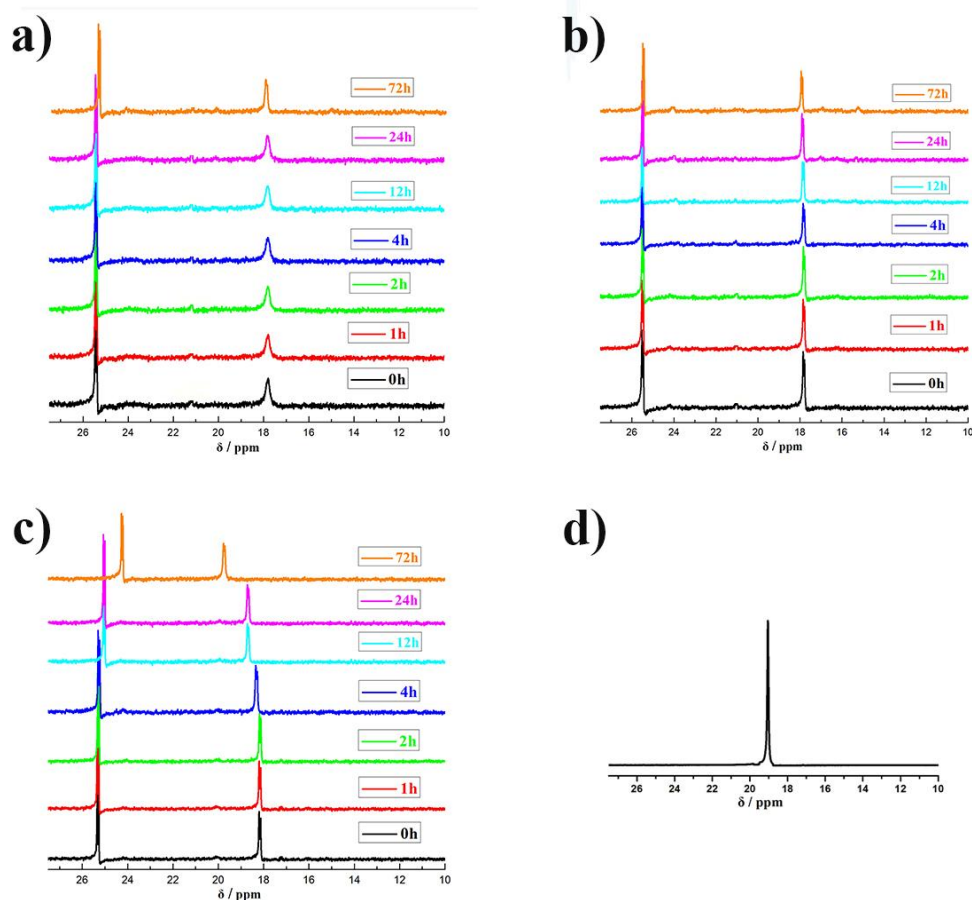

Fig. S4  $^{31}\text{P}$  NMR spectra of 1 (a), 2 (b) and 3 (c) with time dissolved in  $\text{D}_2\text{O}$  at room temperature;  $^{31}\text{P}$  NMR spectrum of  $\text{H}_2\text{O}_3\text{PCH}_2\text{PO}_3\text{H}_2$  (d) dissolved in  $\text{D}_2\text{O}$  at room temperature.

#### Section5. Thermogravimetric analyses of 1–3

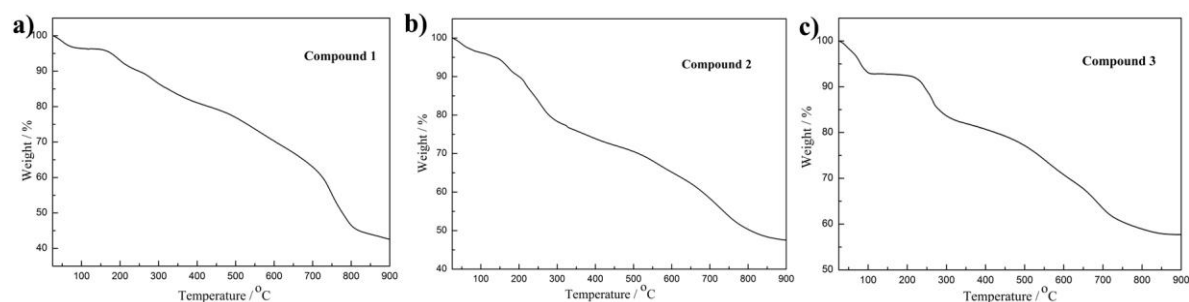

Fig. S5 Thermogravimetric analysis curve of 1–3.

To investigate the thermal stabilities of 1–3, thermal gravimetric (TG) analyses were performed under a nitrogen flow in the range of 25–900  $^{\circ}\text{C}$ . The TG curve of 1 shows two slow steps of weight loss in the temperature range 25–900  $^{\circ}\text{C}$  (Fig. S5a). The weight loss of 4.43 % from 25 to 168  $^{\circ}\text{C}$  is ascribed to the escaping of nine point five crystalline water molecules (calc. 9.25 %). The residual weight loss at this temperature range is high that expected for the stoichiometric amount, which probably because these crystals easily lost crystalline water molecules in the air. The second step of weight loss is 53.01% at 168–900  $^{\circ}\text{C}$ , which is attributed to the loss of one  $\text{H}_2\text{O}_3\text{PCH}_2\text{PO}_3\text{H}_2$  molecule, two p-hydroxybenzoic acid molecules, five  $\text{C}_3\text{H}_4\text{N}_2$  molecules and the sublimation of metal oxides. [S2]

For **2** (Fig.S5b), the first step of weight loss is 5.58 % from 25 to 150 °C, which is assigned to the removal of eight crystalline water molecules (calc. 4.67 %). The rest weight loss of 46.86 % in the temperature range 150–900 °C is corresponding to the decomposition of POM framework and the release of eight C<sub>3</sub>H<sub>4</sub>N<sub>2</sub> molecules, two H<sub>2</sub>O<sub>3</sub>PCH<sub>2</sub>PO<sub>3</sub>H<sub>2</sub> molecules, four acetic acid molecules, two structure water molecules and the sublimation of metal oxides.

The thermal decomposition process of **3** is approximately divided into three steps (Fig. S5c). The first weight loss of 7.40% from 25 to 180 °C is comparable with the calculated value of 6.61%, corresponding to the loss of fourteen crystalline water molecules. The second step, which occurs from 180 to 490 °C, is attributed to the loss of eight C<sub>3</sub>H<sub>4</sub>N<sub>2</sub> molecules, and the observed weight loss (14.99%) is in agreement with the calculated value (14.27%). The third stage is attributed to the release of two malonic acid molecules, two H<sub>2</sub>O<sub>3</sub>PCH<sub>2</sub>PO<sub>3</sub>H<sub>2</sub> molecules and the sublimation of metal oxides., and the observed weight loss of 19.90% can compare with the calculated value of 18.69% from 490 to 900 °C.

### Section6. Bond valence sum calculations of Mo, P and O atoms on POM fragments in 1–3

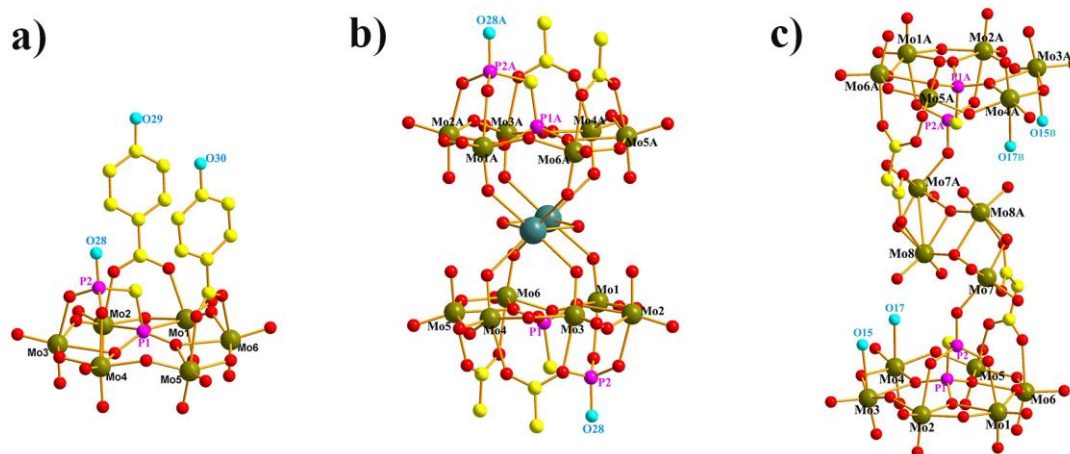

**Fig. S6** The representation of Mo, P and O atoms labeling of **1a–3a** (The protonized O atoms with sky blue color).

**Table S1** Bond valence sum parameters for Mo atoms and P atoms on POM fragments in 1–3.

| compound \ P/Mo   | Mo1   | Mo2   | Mo3   | Mo4   | Mo5   | Mo6   | Mo7   | Mo8   | P1    | P2    |
|-------------------|-------|-------|-------|-------|-------|-------|-------|-------|-------|-------|
| Compound <b>1</b> | 6.213 | 6.241 | 6.266 | 6.272 | 6.222 | 6.220 | –     | –     | 2.503 | 2.569 |
| Compound <b>2</b> | 6.044 | 6.065 | 6.067 | 6.104 | 6.138 | 6.082 | –     | –     | 2.355 | 2.470 |
| Compound <b>3</b> | 6.059 | 6.069 | 6.131 | 6.060 | 6.101 | 6.156 | 6.060 | 6.098 | 2.453 | 2.455 |

**Table S2** The bond valence sum calculations of the oxygen atoms in **1a**.

| Atom | Bond valence sum | Atom | Bond valence sum | Atom | Bond valence sum |
|------|------------------|------|------------------|------|------------------|
| O1   | 1.819            | O2   | 1.832            | O3   | 1.918            |
| O4   | 1.930            | O5   | 1.728            | O6   | 1.921            |
| O7   | 1.737            | O8   | 1.951            | O9   | 2.057            |
| O10  | 1.737            | O11  | 1.854            | O12  | 1.921            |
| O13  | 1.710            | O14  | 1.817            | O15  | 1.779            |
| O16  | 1.767            | O17  | 2.118            | O18  | 1.769            |
| O19  | 1.766            | O20  | 1.714            | O21  | 1.947            |
| O22  | 1.934            | O23  | 1.804            | O24  | 1.878            |
| O25  | 1.874            | O26  | 1.727            | O27  | 1.701            |
| O28  | 1.356            | O29  | 1.162            | O30  | 1.123            |

**Table S3** The bond valence sum calculations of the oxygen atoms in **2a**.

| Atom | Bond valence sum |
|------|------------------|------|------------------|------|------------------|------|------------------|
| O1   | 1.732            | O2   | 1.842            | O3   | 1.672            | O4   | 1.644            |
| O5   | 2.065            | O6   | 1.797            | O7   | 1.732            | O8   | 1.697            |
| O9   | 1.978            | O10  | 1.719            | O11  | 1.715            | O12  | 1.691            |
| O13  | 1.853            | O14  | 1.879            | O15  | 1.893            | O16  | 1.735            |
| O17  | 1.708            | O18  | 1.848            | O19  | 1.962            | O20  | 1.729            |
| O21  | 1.797            | O22  | 1.811            | O23  | 1.878            | O24  | 1.829            |
| O25  | 1.742            | O26  | 1.881            | O27  | 1.691            | O28  | 1.241            |

**Table S4** The bond valence sum calculations of the oxygen atoms in **3a**.

| Atom | Bond valence sum |
|------|------------------|------|------------------|------|------------------|------|------------------|
| O1   | 1.751            | O2   | 1.727            | O3   | 1.732            | O4   | 1.941            |
| O5   | 2.122            | O6   | 1.832            | O7   | 1.712            | O8   | 1.742            |
| O9   | 2.046            | O10  | 1.604            | O11  | 1.770            | O12  | 1.740            |
| O13  | 1.870            | O14  | 1.908            | O15  | 0.242            | O16  | 1.759            |
| O17  | 0.266            | O18  | 1.767            | O19  | 1.973            | O20  | 1.688            |
| O21  | 1.697            | O22  | 2.005            | O23  | 1.899            | O24  | 1.760            |
| O25  | 2.015            | O26  | 1.790            | O27  | 1.721            | O28  | 1.945            |
| O29  | 1.774            | O30  | 1.783            | O31  | 1.936            | O32  | 1.858            |
| O33  | 1.997            | O34  | 1.730            | O35  | 2.025            | O36  | 1.840            |

**Section7. The coordination environment of P1 and P2 atoms in 1–3**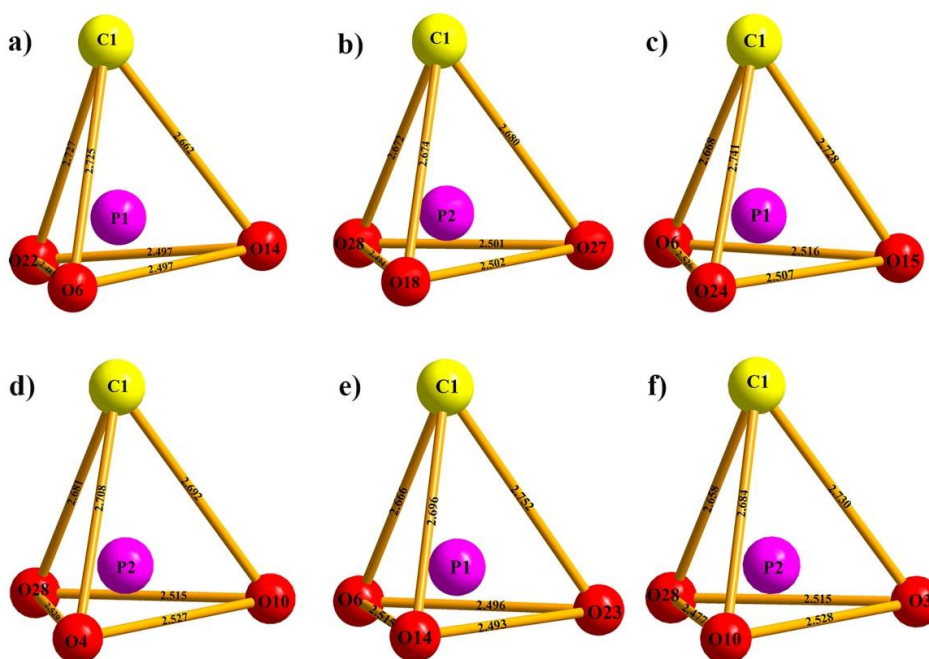**Fig. S7** The coordination environment of P1 and P2. (a and b for **1**; c and d for **2**; e and f for **3**).

Section 8. Some other supporting figures

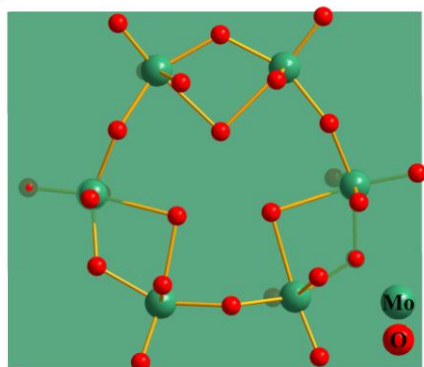

Fig. S8 The structure representation of  $\{Mo_6\}$  plane. (color code: sea green)

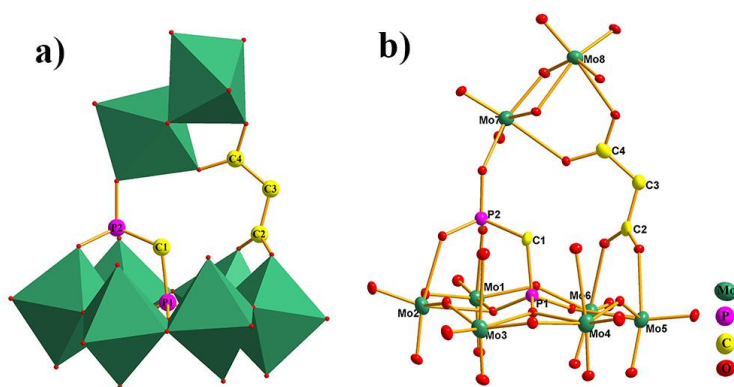

Fig. S9 The structure representation of  $\{(O_3PCH_2PO_3)(Mo_6O_{18}(H_2O)_2)(O_2CCH_2CO_2)(Mo_2O_7)\}$  segment.  
(Hydrogen atoms are omitted for clarity)

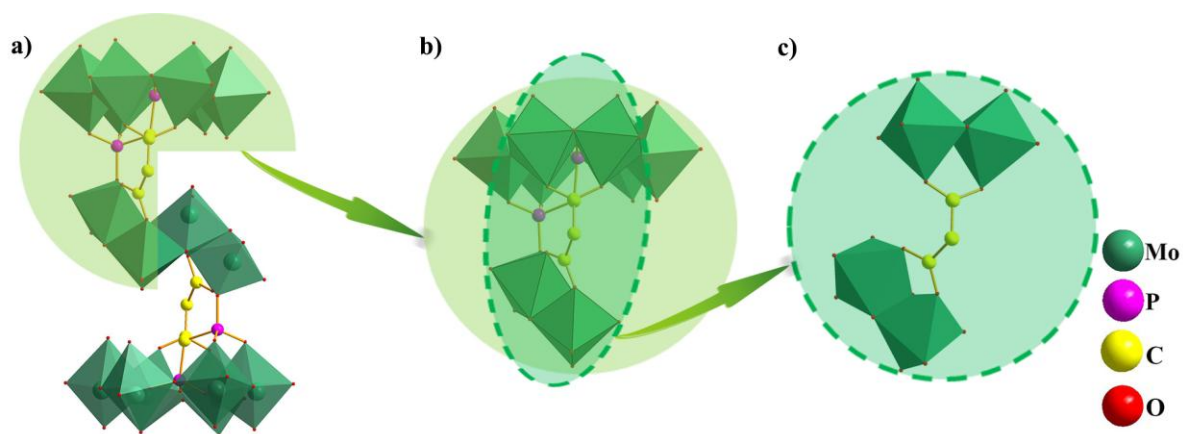

Fig. S10 The bonding way of the two  $\{COO\}$  groups from malonic acid in **3a**.

**Table S5** A summary table of the reaction conditions  
(“√”: feasible; “×”: unfeasible)

| Factor                 | Condition                            | Result |
|------------------------|--------------------------------------|--------|
| Counterion             | $[\text{C}_3\text{N}_2\text{H}_5]^+$ | √      |
|                        | $\text{K}^+$                         | ×      |
| molar ratio of<br>Mo/P | <10/3                                | ×      |
|                        | =10/3                                | √      |
|                        | >10/3                                | ×      |
| Temperature            | <60 °C                               | ×      |
|                        | 60 °C–80 °C                          | √      |
|                        | >80 °C                               | ×      |
| pH                     | <3.5                                 | ×      |
|                        | 3.5–5.5                              | √      |
|                        | >5.5                                 | ×      |

#### Section9. References

- [S1] J. Y. Niu, J. A. Hua, X. Ma and J. P. Wang, *CrystEngComm.*, 2012, **14**, 4060.  
[S2] L. Raki and C. Detellier, *Chem. Commun.*, 1996, 2475.
